# Supplementary material
Source: PubMed Central journal article supplement (PMC4284198)
Supplement: NIHMS56215-supplement-01.pdf [file NIHMS56215-supplement-01.pdf]

**Supplementary Material****Supplementary Figure 1**

Rhinovirus infection induced type I and III IFN expression. BALB/c mice were inoculated i.n. with  $5 \times 10^6$  TCID<sub>50</sub> of RV-1B or UV-inactivated RV-1B. (a) Levels of IFN- $\alpha$  protein in BAL fluid were measured by ELISA. (b) Levels of IFN- $\beta$  mRNA in BAL cells and protein in BAL fluid were measured by qPCR and ELISA respectively. (c) Levels of IFN- $\lambda$  mRNA in lung tissue and protein in BAL fluid were measured by qPCR and ELISAs respectively. All data are representative of three independent experiments. Data was analysed by two-way ANOVA, \*\*\* $p < 0.001$ , \*\* $p < 0.01$  and \* $p < 0.05$  as indicated, all data are expressed as mean  $\pm$  SEM.

**Supplementary Figure 2**

Rhinovirus induced NK cell responses were dependent on live replicating virus. BALB/c mice were inoculated i.n. with  $5 \times 10^6$  TCID<sub>50</sub> of RV-1B, UV-inactivated RV-1B or PBS (mock/0 hours). (a-d) Flow cytometry was used to determine the time course of total numbers of NK cells (CD3<sup>-</sup> NKp46<sup>+</sup>) (a), CD69<sup>+</sup> NK cells (b), IFN- $\gamma$ <sup>+</sup> NK cells (c) and GranzymeB<sup>+</sup> NK cells (d) in the BAL and left lung lobe, at the indicated times post infection. All data are representative of three independent experiments. Data was analysed by two-way ANOVA, \*\*\* $p < 0.001$ , \*\* $p < 0.01$  and \* $p < 0.05$  as indicated, all data are expressed as mean  $\pm$  SEM.

**Supplementary Figure 3**

Intranasal administration of M96 IL-15 neutralising antibody affects NK cell but not T cell populations systemically. BALB/c mice were treated i.n. with M96 antibody, isotype control antibody or PBS. (a) Total number of leukocytes was determined in the spleen and lung. (b-d) Flow cytometry was used to determine the percentage of CD4<sup>+</sup> T cells (CD3<sup>+</sup> CD4<sup>+</sup>) (b) CD8<sup>+</sup> T cells (CD3<sup>+</sup> CD8<sup>+</sup>) (c) and NK cells (CD3<sup>-</sup> NKp46<sup>+</sup>) (d) in the spleen and lung, within the lymphocyte gate, at the indicated times points post treatment. All data are representative of two independent experiments. Data was analysed by

two-way ANOVA, \*\*\* $p < 0.001$ , \*\* $p < 0.01$  and \* $p < 0.05$  as indicated, all data are expressed as mean  $\pm$  SEM.

#### Supplementary Figure 4

IL-15R $\alpha^{-/-}$  mice had a severe deficiency of NK cells and did not mount NK cell responses to rhinovirus infection. IL-15R $\alpha^{-/-}$  and strain matched control wt mice were inoculated i.n. with  $5 \times 10^6$  TCID<sub>50</sub> of RV-1B or PBS (mock/0 hours). (a) Representative flow cytometry plots of BAL and lung NK cells (CD3<sup>-</sup> NKp46<sup>+</sup>) in naïve IL-15R $\alpha^{-/-}$  and wt mice. Numbers indicated on the plots represent the % of events falling within the NK cell gate, from the parent lymphocyte gate. (b) Flow cytometry was used to determine the time course of total numbers of BAL NK cells (CD3<sup>-</sup> NKp46<sup>+</sup>), CD69<sup>+</sup> NK cells, IFN- $\gamma$ <sup>+</sup> NK cells and GranzymeB<sup>+</sup> NK cells. All data are representative of three independent experiments. Data was analysed by two-way ANOVA, \*\*\* $p < 0.001$ , \*\* $p < 0.01$  and \* $p < 0.05$  as indicated, all data are expressed as mean  $\pm$  SEM.

#### Supplementary Figure 5

IFNAR1 $^{-/-}$  mice had deficient NK cell responses to rhinovirus infection. IFNAR1 $^{-/-}$  and strain matched control wt mice were inoculated i.n. with  $5 \times 10^6$  TCID<sub>50</sub> of RV-1B. (a-d) Flow cytometry was used to determine the total numbers of NK cells (CD3<sup>-</sup> NKp46<sup>+</sup>) (a), CD69<sup>+</sup> NK cells (b), IFN- $\gamma$ <sup>+</sup> NK cells (c) and GranzymeB<sup>+</sup> NK cells (d) in the BAL and left lung lobe, at the indicated times post infection. All data are representative of three independent experiments. Data was analysed by two-way ANOVA, \*\*\* $p < 0.001$ , \*\* $p < 0.01$  and \* $p < 0.05$  as indicated, all data are expressed as mean  $\pm$  SEM.

(a-d) Representative flow cytometry plots of BAL NK cells (CD3<sup>-</sup> NKp46<sup>+</sup>) (A), CD69<sup>+</sup> NK cells (B), Granzyme B<sup>+</sup> NK cells (C) and IFN- $\gamma$ <sup>+</sup> NK cells (D) at 48 hours post infection. Numbers indicated on the plots represent the % of events falling within the indicated gate. All data are representative of three independent experiments.

## Supplementary Material

### Supplementary Figure 1

Rhinovirus infection induced type I and III IFN expression. BALB/c mice were inoculated i.n. with  $5 \times 10^6$  TCID<sub>50</sub> of RV-1B or UV-inactivated RV-1B. (a) Levels of IFN- $\alpha$  protein in BAL fluid were measured by ELISA. (b) Levels of IFN- $\beta$  mRNA in BAL cells and protein in BAL fluid were measured by qPCR and ELISA respectively. (c) Levels of IFN- $\lambda$  mRNA in lung tissue and protein in BAL fluid were measured by qPCR and ELISAs respectively. All data are representative of three independent experiments. Data was analysed by two-way ANOVA, \*\*\* $p < 0.001$ , \*\* $p < 0.01$  and \* $p < 0.05$  as indicated, all data are expressed as mean  $\pm$  SEM.

### Supplementary Figure 2

Rhinovirus induced NK cell responses were dependent on live replicating virus. BALB/c mice were inoculated i.n. with  $5 \times 10^6$  TCID<sub>50</sub> of RV-1B, UV-inactivated RV-1B or PBS (mock/0 hours). (a-d) Flow cytometry was used to determine the time course of total numbers of NK cells (CD3<sup>-</sup> NKp46<sup>+</sup>) (a), CD69<sup>+</sup> NK cells (b), IFN- $\gamma$ <sup>+</sup> NK cells (c) and GranzymeB<sup>+</sup> NK cells (d) in the BAL and left lung lobe, at the indicated times post infection. All data are representative of three independent experiments. Data was analysed by two-way ANOVA, \*\*\* $p < 0.001$ , \*\* $p < 0.01$  and \* $p < 0.05$  as indicated, all data are expressed as mean  $\pm$  SEM.

### Supplementary Figure 3

Intranasal administration of M96 IL-15 neutralising antibody affects NK cell but not T cell populations systemically. BALB/c mice were treated i.n. with M96 antibody, isotype control antibody or PBS. (a) Total number of leukocytes was determined in the spleen and lung. (b-d) Flow cytometry was used to determine the percentage of CD4<sup>+</sup> T cells (CD3<sup>+</sup> CD4<sup>+</sup>) (b) CD8<sup>+</sup> T cells (CD3<sup>+</sup> CD8<sup>+</sup>) (c) and NK cells (CD3<sup>-</sup> NKp46<sup>+</sup>) (d) in the spleen and lung, within the lymphocyte gate, at the indicated times points post treatment. All data are representative of two independent experiments. Data was analysed by

two-way ANOVA, \*\*\* $p < 0.001$ , \*\* $p < 0.01$  and \* $p < 0.05$  as indicated, all data are expressed as mean  $\pm$  SEM.

#### Supplementary Figure 4

IL-15R $\alpha^{-/-}$  mice had a severe deficiency of NK cells and did not mount NK cell responses to rhinovirus infection. IL-15R $\alpha^{-/-}$  and strain matched control wt mice were inoculated i.n. with  $5 \times 10^6$  TCID<sub>50</sub> of RV-1B or PBS (mock/0 hours). (a) Representative flow cytometry plots of BAL and lung NK cells (CD3<sup>-</sup> NKp46<sup>+</sup>) in naïve IL-15R $\alpha^{-/-}$  and wt mice. Numbers indicated on the plots represent the % of events falling within the NK cell gate, from the parent lymphocyte gate. (b) Flow cytometry was used to determine the time course of total numbers of BAL NK cells (CD3<sup>-</sup> NKp46<sup>+</sup>), CD69<sup>+</sup> NK cells, IFN- $\gamma$ <sup>+</sup> NK cells and GranzymeB<sup>+</sup> NK cells. All data are representative of three independent experiments. Data was analysed by two-way ANOVA, \*\*\* $p < 0.001$ , \*\* $p < 0.01$  and \* $p < 0.05$  as indicated, all data are expressed as mean  $\pm$  SEM.

#### Supplementary Figure 5

IFNAR1<sup>-/-</sup> mice had deficient NK cell responses to rhinovirus infection. IFNAR1<sup>-/-</sup> and strain matched control wt mice were inoculated i.n. with  $5 \times 10^6$  TCID<sub>50</sub> of RV-1B. (a-d) Flow cytometry was used to determine the total numbers of NK cells (CD3<sup>-</sup> NKp46<sup>+</sup>) (a), CD69<sup>+</sup> NK cells (b), IFN- $\gamma$ <sup>+</sup> NK cells (c) and GranzymeB<sup>+</sup> NK cells (d) in the BAL and left lung lobe, at the indicated times post infection. All data are representative of three independent experiments. Data was analysed by two-way ANOVA, \*\*\* $p < 0.001$ , \*\* $p < 0.01$  and \* $p < 0.05$  as indicated, all data are expressed as mean  $\pm$  SEM.

Supplementary Figure 1

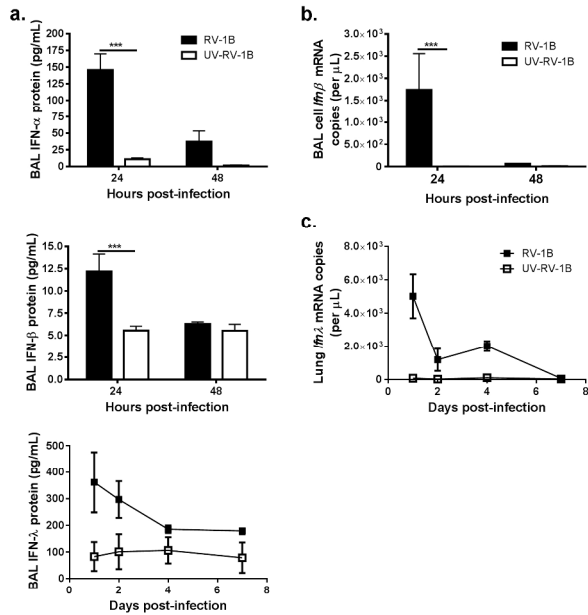

209x297mm (300 x 300 DPI)

Supplementary Figure 2

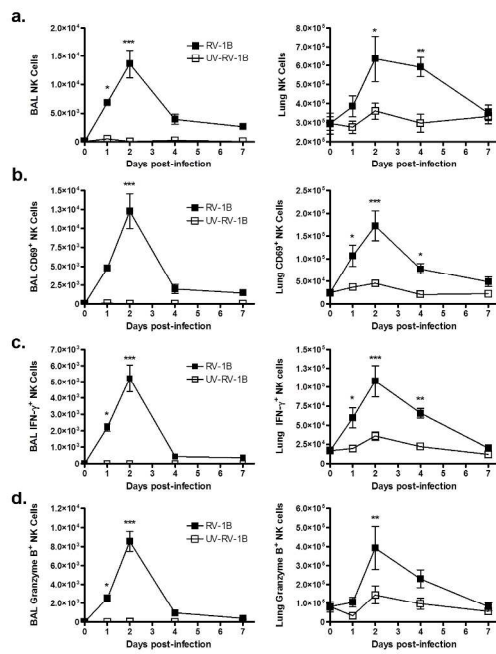

215x279mm (300 x 300 DPI)

Supplementary Figure 3

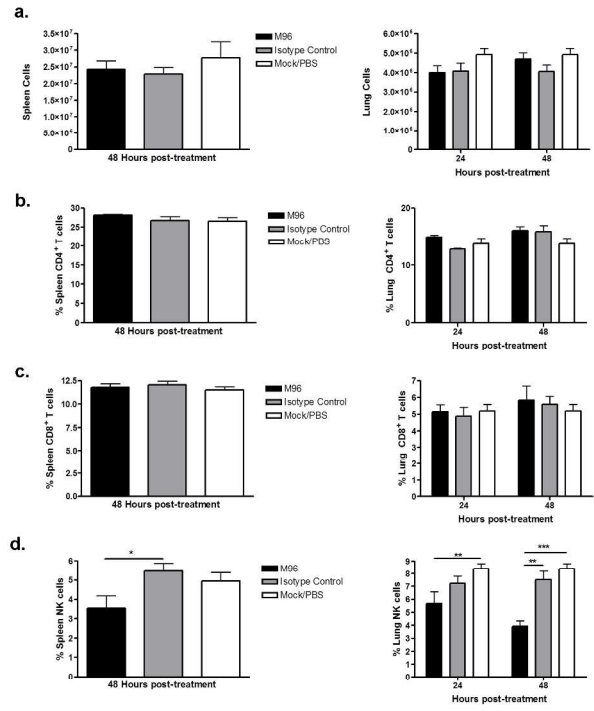

215x279mm (300 x 300 DPI)

## Supplementary Figure 4

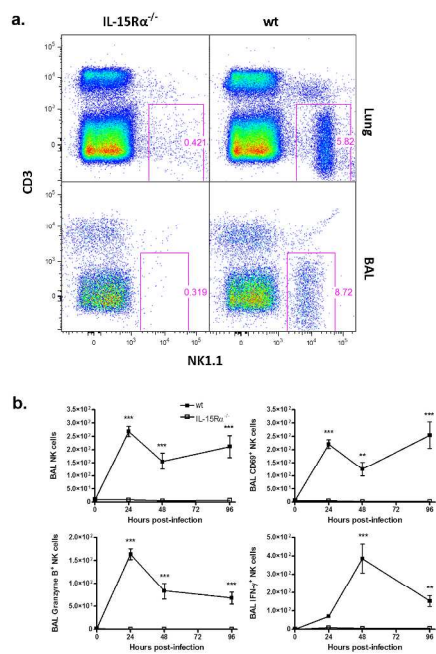

209x297mm (300 x 300 DPI)



Supplementary Figure 5

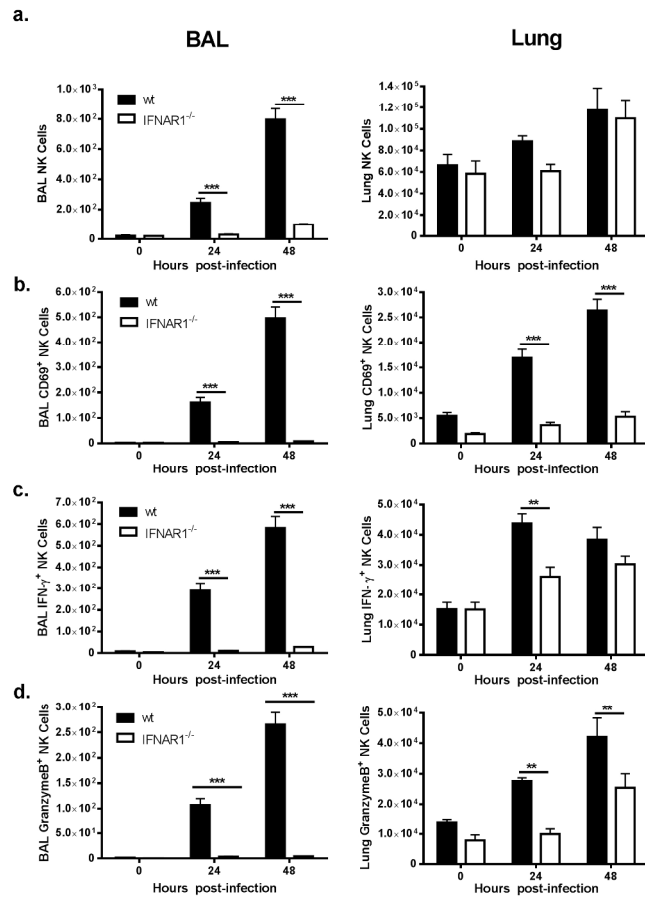

209x297mm (300 x 300 DPI)
